# Supplementary material
Source: PubMed Central journal article supplement (PMC2906890)

## Online Supporting Information Appendix

**Collection of Flies for Population Survey.** Flies were collected from four pairs of sympatric apple and hawthorn populations in the Midwestern U.S. during the summers of 2001 and 2002 (Table S1, Fig. S1). We also collected hawthorn flies from a site near Brazos Bend, TX in October 2005. Flies were collected from nature as larvae feeding within host fruit. Infested fruit were transported back to the lab where they were held at 21° C in a temperature chamber with a 15: 9 hr. light:dark cycle. Emerging larvae leaving host fruit and forming puparia were collected on a daily basis and transferred to petri dishes containing moist vermiculite. The dishes were held for an additional 10 days at 21° C before being over-wintered at 4° C in a refrigerator. These conditions cause minimal selection on flies. After a 5 month overwintering period, fly pupae were removed from the cold and placed in a 21° C walk-in incubator set for a 14:10 hr. light:dark cycle. Newly eclosing adults were collected on a daily basis and stored in a - 80° C freezer.

**Microsatellite Mapping.** Evolutionary map distances for chromosomes 2 and 5 could be organized in a largely linear fashion, while those for chromosomes 1, 3, and 4 were complex, reticulate networks (Fig. S2). Despite the extensive inversion polymorphism, the microsatellites analyzed in the study appeared to be well-distributed along each of the five chromosomes surveyed. Previous crosses scored for allozymes and cDNA markers indicated overall evolutionary recombination distances of 143.2, 66.1, 50.8, and 132.5 centiMorgans for chromosomes 1-4, respectively (1) (Note: allozymes and cDNA cross data for chromosome 5 were insufficient to estimate its recombination length). In comparison, the estimates for the microsatellites in the current study generally yielded total recombination maps of 103.7, 62.7, 125.2, and 135.3 for chromosomes 1-4, respectively, and 100.4 for chromosome 5. The generally similar total recombination lengths of chromosomes were not due to us scoring larger numbers of microsatellites loci per chromosome. Indeed, fewer microsatellites were surveyed per chromosome (mean = 6.7) than in previous allozyme and cDNA analyses (mean = 11.2). The allozymes examined in the current study were NADH-diaphorase-2 (*Dia-2*), aspartate amino transferase-2 (*Aat-2*), malic enzyme (*Me*), aconitase-2 (*Acon-2*), mannose phosphate isomerase (*Mpi*), and hydroxyacid dehydrogenase (*Had*).

**Outlier Analysis of Population Survey Data.** We tested for  $F_{ST}$  outliers in two different ways. The first outlier analysis we used was based on the commonly employed ‘fdist’ method of Beaumont and Nichols (2), as implemented in LOSITAN (3). This method uses computer simulations to generate the distribution of  $F_{ST}$  values expected under neutrality, and then compares observed empirical  $F_{ST}$  values to the distribution of simulated values. Loci whose empirical  $F_{ST}$  estimates fall above the upper extreme (e.g., 95 or 99% quantile) of the simulated distribution are deemed outliers. We applied this approach by approximating the mean neutral  $F_{ST}$  in the empirical dataset using the ‘mean neutral  $F_{ST}$ ’ and ‘force mean  $F_{ST}$ ’ options in LOSITAN (the former removes potentially selected loci when estimating neutral  $F_{ST}$ ). A total of 10,000 simulations were used in all instances. We report results from the stepwise mutation model, but very similar results were obtained using the infinite alleles model). Applying this approach to each of the four sympatric apple and hawthorn population pairs revealed three outlier loci at the 95% level (microsatellite locus P16 between apple and hawthorn populations at the Urbana, IL sympatric site, allozyme locus *Me* at Dowagiac, MI, allozyme locus *Acon-2* at the Fennville, MI site, and allozyme loci *Me* and *Acon-2* at the Grant, MI site). No outliers were detected at the 99% level for any population comparison.

The second outlier analysis we used was based on the recently developed method of Foll

and Gaggiotti (4) which directly compares models with versus without selection, thereby providing the probability that a given locus is under selection. These analyses were implemented using default settings in BayeScan. The program outputs the posterior probability of models with selection versus without selection acting on a given locus. This probability cannot be compared directly to a P-value, but is instead interpreted using the “Bayes factor”, which is the  $\log_{10}$  ratio of posterior model probabilities. Bayes factors  $>1.0$ ,  $> 1.5$ , and  $> 2$  are considered strong, very strong and decisive support, respectively, for the selection model over the alternative no selection model (5). The Foll and Gaggiotti method yielded results congruent with those of Beaumont and Nichols, as the same three loci (P16, *Me*, and *Acon-2*) exhibited strong evidence for outliers status (Bayes factors  $> 1.0$ ) in at least one pair-wise sympatric site comparison (Fig. S3). However, only *Acon-2* exhibited strong evidence for outlier status at more than one pair-wise sympatric site comparison and ‘decisive’ evidence for selection (Bayes Factor  $> 2$ ; Fig. S3). Additionally, linkage disequilibrium analysis for the 3 loci P16, *Me*, and *Acon-2* indicated that only two independent genomic regions defined by *Me* and *Acon-2* (chromosome 2) and P16 (chromosome 3) exhibited outlier status.

It is conceivable that the comparatively low total number of microsatellite and allozyme loci we used in the outlier analyses may have affected our results, as genome scans commonly involve a hundred or more genes to set background  $F_{ST}$  levels expected for neutrality (3). The microsatellites may have been more sensitive to the detection of selection due to their presumably higher mutation rate and polymorphism levels than other types of loci, such as AFLPs and SNPs (5). Consequently, the background  $F_{ST}$  level could have been elevated because it reflected a number of loci under selection, making it difficult to detect outliers. However, even if including additional numbers of other classes of loci would have lowered the background  $F_{ST}$  level, this would have only served to heighten the number of microsatellites detected as outliers in the analysis. In this case, the outlier analysis would simply be more congruent with the bootstrap analysis and the selection experiment, both of which support the multifarious selection hypothesis by indicating selection acting on numerous genomic regions.

**Statistical Analysis of Selection Experiment.** Selection coefficients ( $s$ ) were calculated for loci in the selection experiment by first determining the relative frequencies of genotypes in the 35 day non-diapausing and 7 day diapausing treatments. Under the assumption that limited selection was imposed by the 7 day diapausing treatment, the absolute fitness of a genotype was estimated as the frequency of the genotype in the 35-day treatment divided by its frequency in the 7 day treatment. Relative fitness values were then calculated by dividing by the highest absolute fitness value among genotype classes for a locus. The selection coefficient ( $s$ ) was taken as the difference in relative fitness between homozygote genotypes, with the dominance term ( $h$ ) estimated from the equation:

$$W_{Aa} = 1 - hs \quad \text{where, } W_{Aa} = \text{the relative fitness of the heterozygote genotype.}$$

Marginal fitnesses ( $W_m$ ) for the favored class of alleles in the selection experiment were calculated by first noting that 15% of pupae in the 35 day treatment eclosed as non-diapausing adults. We therefore considered the remaining 85% of pupae in the 35 day treatment as representing diapausing flies. Allele frequencies for these diapausing flies were estimated as:

$$f_{d35} = (f_{d7} - (0.15 \times f_{nd35}))/0.8 \quad \text{where,}$$

$f_{d7}$  = the allele frequency at a locus for diapausing flies eclosing in the 7 day treatment.  
 $f_{nd35}$  = the allele frequency at a locus for non-diapausing flies in the 35 day treatment.

The relative marginal fitness was then calculated as:

$$W_m = f_{d35} / f_{d7}$$

Spearman rank correlations were then performed between  $W_m$  and  $F_{ST}$  values for loci using the R statistical package, with significance determined based on a Z-transformation test (6) and jackknife analysis across loci.

Patterns of linkage disequilibrium between loci, as determined by the composite method of Weir (7), were used to estimate the minimum number of independent genomic regions affected by selection in the diapause rearing experiment. Significant linkage disequilibrium was detected between nine responding microsatellites on chromosome 1 (P71, P37, P75), chromosome 2 (P26, P46, P73), and chromosome 3 (P7, P16, P69) in the rearing study and the corresponding allozymes that mapped to the same chromosomes (*Dia-2*, *Aat-2* [chr. 1]; *Me*, *Acon-2*, *Mpi* [chr. 2]; *Had* [chr. 3]; (Table S3). Significant linkage disequilibrium was not observed between any of the other 13 microsatellites which responded to selection in the rearing experiment or between any pair of loci (microsatellites or allozymes) mapping to different chromosomes. Thus, a minimum of 16 different loci or genomic regions (= 13 microsatellites in linkage equilibrium + 3 allozyme/microsatellite linked regions) dispersed throughout the genome responded to selection. Using a similar line of reasoning, we determined 1) that a minimum of 17 different genomic regions displayed host-related differentiation between apple and hawthorn flies, 13 of which overlap with regions responding to selection in the diapause rearing experiment, and 2) that a minimum of 12 different genes/genomic regions showed significant relationships with adult eclosion time, 10 of which also significantly responded in the selection experiment.

### Supporting Information References

1. Feder JL, Roethel JB, Filchak K, Niedbalski J, Romero-Severson J (2003) Evidence for inversion polymorphism related to sympatric host race formation in the apple maggot fly, *Rhagoletis pomonella*. *Genetics* 163: 939-953.
2. Beaumont MA, Nichols RA (1996) Evaluating loci for use in the genetic analysis of population structure. *Proc. R. Soc. Lond. B.* 263: 1619–1626.
3. T. Antao, A. Lopes, R.J. Lopes, A. Beja-Pereira, G. Luikart (2008) LOSITAN: A workbench to detect molecular adaptation based on a  $F_{st}$  -outlier method. *BMC Bioinformatics* 9: 323.
4. Foll M, Gaggiotti OA (2008) *Genetics* 180: 977-993.
5. Beaumont MA (2005) Adaptation and speciation: what can  $F_{st}$  tell us? *Trends Ecol Evol* 20: 435–440.
6. Sokal RR, Rolf FJ (1981) *Biometry 2nd edition* (Freeman and Co., San Francisco).
7. Weir B (1979) Inferences about linkage disequilibrium. *Biometrics* 35: 235-254.
8. Velez S, Taylor MS, Noor MAF, Lobo NF, Feder JL (2006) Isolation and characterization of microsatellite loci from the apple maggot fly, *Rhagoletis pomonella* (Diptera: Tephritidae). *Molecular Ecology Notes* 6: 90-92.

**Table S1.** *Rhagoletis pomonella* collection sites in the U.S. See Fig. S1 for map of sites. Sample sizes (n) = number of apple (A) and hawthorn (H) flies, respectively, genotyped for the 33 microsatellite loci and six allozymes (in parentheses) at a site.

| Site # | City        | State    | Latitude      | Longitude      | Races | Sample size (n)    |
|--------|-------------|----------|---------------|----------------|-------|--------------------|
| 1      | Grant       | Michigan | 43°21'00.17"N | 85°53'21.98"W  | A, H  | 46 (706), 48 (467) |
| 2      | Fennville   | Michigan | 42°36'06.17"N | 86° 09'22.19"W | A, H  | 96 (30), 96 (33)   |
| 3      | Dowagiac    | Michigan | 41°52'39.36"N | 86°13'49.81"W  | A, H  | 47 (31), 48 (32)   |
| 4      | Urbana      | Illinois | 40°07'19.46"N | 88°12'09.25"W  | A, H  | 48 (60), 46 (60)   |
| 5      | Brazos Bend | Texas    | 29°22'15.55"N | 95°35'08.16"W  | H     | 33 (0)             |

**Table S2.** Genetic responses in the selection experiment and eclosion study, clinal patterns of latitudinal variation, and host-related differentiation. Shown are the selective differences (Sel. Dif.) in allele frequencies for loci between flies eclosing in the 7 day diapause minus the 35 day non-diapause treatments. The letter prefix “a” denotes that diapause treatment flies had a higher frequency of the allele class more common to the apple race at the Grant, MI site, “h” denotes that these flies had a higher frequency of hawthorn race alleles, “n” denotes a higher frequency of alleles more common in northern hawthorn fly populations, and “s” denotes southern hawthorn fly populations. Estimates for selection coefficients (s) and the degree of dominance (h) for heterozygotes are also given. Eclosion Time = F-ratios for ANOVA tests for the main effect of genotype (G) or genotype x host interaction (I) on adult eclosion time. The letter prefixes “a, h, n, and s” denote whether flies possessing alleles more common to the apple race (a) or hawthorn race (h) at the Grant, MI site or southern (s) vs. northern (n) hawthorn fly populations eclosed the latest. Haw Cline and Apple Cline represent the product of the slope (b) and explained variation ( $r^2$ ) for linear regressions of allele frequencies vs. latitude among hawthorn and apple fly sites. \* =  $P \leq 0.05$ ,  $P \leq 0.01$ , \*\*\* =  $P \leq 0.001$ , \*\*\*\* =  $P \leq 0.0001$ , \*\*\*\*\* =  $P \leq 0.000001$ , as determined by Fisher’s exact test for Sel. Dif. and Monte Carlo bootstrapping analysis for Haw and Apple Cline values. Host Dif. indicates whether a locus displayed genetic differentiation between apple and hawthorn fly races as determined by: 1) a significant F-test for heterogeneity between regression slopes of allele frequency vs. latitude between hawthorn and apple fly populations (denoted by “b”), 2) a significant host or a significant host x latitude interaction in the Monte Carlo bootstrap ANOVA analysis (denoted by “H” and H/L”, respectively), or 3) significant allele frequency differences at individual sympatric sites (denoted by “S”). No = no significant host difference in tests. Dark bars indicate loci displaying significant pairwise linkage disequilibrium.

| <u>Chromosome</u> | <u>Locus</u>  | <u>Sel. Dif.</u> | <u>s</u> | <u>h</u> | <u>Eclosion Time</u> | <u>Haw Cline</u> | <u>Apple Cline</u> | <u>Host Dif.</u> |
|-------------------|---------------|------------------|----------|----------|----------------------|------------------|--------------------|------------------|
| Chrom. 1          | <i>Aat-2</i>  | a n 0.1130 **    | 0.309    | 0.590    | 1.464                | +0.0515 *****    | +0.0001            | H, S             |
|                   | <i>Dia-2</i>  | a n 0.0917 **    | 0.070    | 4.215    | a s I 3.298 *        | +0.0524 *****    | +0.0015            | b, H/L, S        |
|                   | P71           | a n 0.0833 *     | 0.220    | 0.673    | 1.843                | +0.0245 *****    | +0.0480 *****      | H, S             |
|                   | P37           | a n 0.1202 **    | 0.274    | 0.536    | 1.151                | +0.0469 *****    | +0.0730 *****      | H, S             |
|                   | P75           | a n 0.0795 *     | 0.121    | 1.373    | h s G 4.236 *        | +0.0507 *****    | +0.0408 *****      | <u>No</u>        |
|                   | P4            | h s 0.0090       | 0.069    | -0.541   | 0.778                | +0.0164 ****     | +0.0187            | <u>No</u>        |
|                   | P64           | a s 0.1304 *     | 0.099    | 0.550    | 0.238                | +0.0206 ***      | +0.0061            | H                |
|                   | P3            | a s 0.0795 *     | 0.101    | 0.518    | 0.502                | +0.0087 ***      | - 0.0590 *****     | b, H/L, S        |
| Chrom. 2          | P70           | h s 0.1230 *     | 0.083    | 0.571    | 0.408                | +0.0269 *****    | +0.0733 *****      | <u>No</u>        |
|                   | <i>Mpi</i>    | a s 0.0460       | 0.155    | 0.519    | a s G 6.880 **       | +0.0037 *        | +0.0008            | H/L, S           |
|                   | P59           | a s 0.0956       | 0.115    | 0.242    | a s G 3.310 *        | +0.0254 *****    | +0.0119            | b                |
|                   | <i>Acon-2</i> | a s 0.1206 *     | 0.159    | 0.518    | a s G 5.352 **       | +0.0184 *****    | +0.0014            | b, H/L, S        |
|                   | <i>Me</i>     | a s 0.1747 ***   | 0.253    | 0.230    | a s G 3.963 *        | +0.0205 *****    | +0.0089            | H/L, S           |
|                   | P26           | a s 0.1840 ***   | 0.255    | 0.204    | 0.475                | +0.0168 *****    | - 0.0861 *****     | b, H/L, S        |
|                   | P46           | h n 0.1497 **    | 0.128    | 0.579    | 1.168                | +0.0333 *****    | - 0.0297 **        | b                |
| P73               | a s 0.1255 *  | 0.109            | 0.657    | 1.104    | +0.0034 *            | - 0.0073         | <u>No</u>          |                  |

**Table S2 (cont.)**

| <u>Chromosome</u> | <u>Locus</u> | <u>Sel. Dif.</u> | <u>s</u> | <u>h</u> | <u>Eclosion Time</u> | <u>Haw Cline</u> | <u>Apple Cline</u> | <u>Host Dif.</u> |
|-------------------|--------------|------------------|----------|----------|----------------------|------------------|--------------------|------------------|
| Chrom. 2          | P32          | a n 0.0253       | 0.049    | -0.079   | 0.392                | +0.0088 *****    | +0.0670 *****      | b                |
|                   | P54          | h n 0.1104 *     | 0.534    | 0.067    | 2.001                | +0.0199 *****    | - 0.0247 **        | b                |
| Chrom. 3          | P69          | a s 0.1680 ***   | 0.145    | 0.573    | a s G 5.305 **       | +0.0227 *****    | +0.0370 **         | S                |
|                   | <i>Had</i>   | a s 0.0649       | 0.091    | 0.219    | a s I 3.138 *        | +0.0517 ****     | +0.0445 ****       | H/L, S           |
|                   | P7           | a s 0.1345 **    | 0.152    | 0.389    | 0.302                | +0.0320 *****    | - 0.0215 *         | b, H/L, S        |
|                   | P16          | a s 0.0789 *     | 0.061    | -0.965   | a s G 3.365 *        | +0.0296 *****    | - 0.0014           | H/L, S           |
|                   | P68          | a s 0.0390       | 0.030    | -1.128   | a s G 3.099 *        | +0.0394 *****    | - 0.0027           | b, H/L, S        |
|                   | P80          | a s 0.0649       | 0.091    | 0.219    | 0.247                | +0.0127 ****     | - 0.0312 **        | b, H/L, S        |
|                   | P23          | a n 0.0656       | 0.141    | -0.029   | 0.904                | +0.0276 *****    | +0.0734 *****      | b                |
|                   | P66          | a s 0.1215 *     | 0.121    | 0.465    | 0.341                | +0.0129 *****    | +0.0052            | b, H, S          |
| Chrom. 4          | P11          | a s 0.1041 *     | 0.127    | 0.646    | h n I 4.416 *        | +0.0121 *****    | - 0.0191 **        | b                |
|                   | P29          | h n 0.0948       | 0.101    | 0.565    | 0.207                | +0.0140 *****    | - 0.0011           | H, S             |
|                   | P25          | a s 0.1366 **    | 0.120    | 0.515    | a s I 3.049 *        | +0.0071 *        | +0.0291 **         | H, S             |
|                   | P50          | a s 0.1046 *     | 0.126    | 0.478    | a s I 3.163 *        | +0.0058 **       | - 0.0303 *****     | b                |

**Table S2 (cont.)**

| <u>Chromosome</u> | <u>Locus</u> | <u>Sel. Dif.</u> | <u>s</u> | <u>h</u> | <u>Eclosion Time</u> | <u>Haw Cline</u> | <u>Apple Cline</u> | <u>Host Dif.</u> |
|-------------------|--------------|------------------|----------|----------|----------------------|------------------|--------------------|------------------|
| Chrom. 4          | P19          | a n 0.0800 *     | 0.117    | 0.737    | h n I 5.651 **       | +0.0098 ****     | +0.0084            | <u>No</u>        |
|                   | P12          | h n 0.0108       | 0.039    | 0.051    | a s G 3.957 *        | +0.0064 **       | - 0.0456 ****      | H, S             |
| Chrom. 5          | P5           | h n 0.1048 *     | 0.103    | 0.347    | h n G 9.295 ***      | +0.0207 ****     | +0.0001            | S                |
|                   | P18          | a s 0.0988 **    | 0.606    | 0.241    | h n I 3.056 *        | +0.0091 ****     | - 0.0416 ****      | b, H/L, S        |
|                   | P9           | h n 0.0050       | 0.020    | 2.491    | a s G 3.635 *        | +0.0065 **       | +0.0001            | <u>No</u>        |
|                   | P72          | h s 0.1289 **    | 0.151    | 0.683    | h s I 3.303 *        | +0.0049 **       | +0.0151 **         | <u>No</u>        |
|                   | P55          | h n 0.0628       | 0.060    | 1.072    | 0.483                | +0.0094 ***      | - 0.0361 ****      | b                |
|                   | P45          | a s 0.0862 *     | 0.146    | 1.289    | 1.252                | +0.0419 ****     | - 0.0074           | b, H/L, S        |
|                   | P27          | h n 0.0520       | 0.080    | 0.310    | a s G 3.729 *        | +0.0105 ****     | - 0.0087 *         | b                |



**Table S3.** Composite linkage disequilibrium values as determined by the method of Weir (7) between indicated pairs of microsatellite loci and/or allozymes. Haw Pop. = combined disequilibrium value for Urbana, IL, Dowagiac, MI, Fennville, MI and Grant, MI hawthorn fly populations estimated and tested by meta-analysis of z-transformed values for individual sites. Apple Pop. = combined disequilibrium value for Urbana, IL, Dowagiac, MI, Fennville, MI and Grant, MI apple fly populations estimated and tested by meta-analysis of z-transformed values for individual sites. Haw Diap. = composite linkage disequilibrium value for hawthorn flies from Grant, MI exposed to diapause rearing conditions of a 7 day prewinter period at 25°C and 30 week overwinter period of 5°C. Haw ND = composite linkage disequilibrium value for hawthorn flies from Grant, MI undergoing non-diapause development and eclosing after 35 days when reared continuously at 25°C. No significant disequilibrium was detected between loci mapping to different chromosomes. \* =  $P \leq 0.05$ ,  $P \leq 0.01$ , \*\*\* =  $P \leq 0.001$ , \*\*\*\* =  $P \leq 0.0001$

| <b><u>Chromosome</u></b> | <b><u>Loci</u></b>          | <b><u>Haw Pops.</u></b> | <b><u>Apple Pops.</u></b> | <b><u>Haw Diap.</u></b> | <b><u>Haw ND</u></b> |
|--------------------------|-----------------------------|-------------------------|---------------------------|-------------------------|----------------------|
| Chrom. 1                 | P71/P37                     | +0.502 ****             | +0.707****                | +0.413 ***              | +0.568 ****          |
|                          | P71/P75                     | +0.642 ****             | +0.801****                | +0.564 ****             | +0.686 ****          |
|                          | P37/P75                     | +0.543 ****             | +0.569****                | +0.451 ****             | +0.685 ****          |
|                          | P71/ <i>Dia-2</i>           | ---                     | ---                       | +0.709 ****             | +0.522 ****          |
|                          | P71/ <i>Aat-2</i>           | ---                     | ---                       | +0.541 ****             | +0.435 ****          |
|                          | P37/ <i>Dia-2</i>           | ---                     | ---                       | +0.486 ****             | +0.532 ****          |
|                          | P37/ <i>Aat-2</i>           | ---                     | ---                       | +0.348 **               | +0.529 ****          |
|                          | P75/ <i>Dia-2</i>           | ---                     | ---                       | +0.757 ****             | +0.766 ****          |
|                          | P75/ <i>Aat-2</i>           | ---                     | ---                       | +0.658 ****             | +0.622 ****          |
|                          | <i>Dia-2</i> / <i>Aat-2</i> | ---                     | ---                       | +0.692 ****             | +0.574 ****          |

**Table S3 (cont.)**

| <b><u>Chromosome</u></b> | <b><u>Loci</u></b> | <b><u>Haw Pops.</u></b> | <b><u>Apple Pops.</u></b> | <b><u>Haw Diap.</u></b> | <b><u>Haw ND</u></b> |
|--------------------------|--------------------|-------------------------|---------------------------|-------------------------|----------------------|
| Chrom. 2                 | P59/P73            | +0.233 **               | - 0.077                   | +0.007                  | +0.105               |
|                          | P26/P73            | +0.037                  | +0.025                    | +0.177                  | +0.210 *             |
|                          | P59/ <i>Me</i>     | ---                     | ---                       | +0.226 *                | +0.105               |
|                          | P59/ <i>Acon-2</i> | ---                     | ---                       | +0.259 *                | +0.135               |
|                          | P26/ <i>Me</i>     | ---                     | ---                       | +0.277 **               | +0.121               |
|                          | P46/ <i>Me</i>     | ---                     | ---                       | +0.226 *                | +0.121               |
|                          | P46/ <i>Acon-2</i> | ---                     | ---                       | +0.273 *                | +0.017               |
|                          | P73/ <i>Me</i>     | ---                     | ---                       | +0.236 *                | - 0.100              |
|                          | P73/ <i>Mpi</i>    | ---                     | ---                       | +0.257 *                | - 0.048              |
|                          | <i>Me/Acon-2</i>   | ---                     | ---                       | +0.435 *****            | +0.575 *****         |
|                          | <i>Me/Mpi</i>      | ---                     | ---                       | +0.181                  | +0.221 **            |
|                          | <i>Acon-2/Mpi</i>  | ---                     | ---                       | +0.134                  | +0.285 ***           |
| Chrom. 3                 | P69/P7             | +0.108                  | +0.220 *                  | +0.068                  | - 0.004              |
|                          | P7/P16             | +0.195 **               | +0.372 *****              | +0.145                  | +0.309 ***           |
|                          | P7/P68             | +0.340 *****            | +0.356 *****              | - 0.036                 | - 0.013              |
|                          | P7/P80             | +0.111                  | +0.306 *****              | +0.235 *                | - 0.019              |
|                          | P7/P23             | +0.158 *                | +0.156 *                  | - 0.030                 | +0.031               |
|                          | P16/P68            | +0.256 **               | +0.409 *****              | +0.401 ***              | +0.106               |
|                          | P16/P23            | - 0.091                 | +0.248 **                 | +0.243                  | +0.112               |
|                          | P68/P80            | +0.272 *****            | +0.282 ***                | +0.045                  | - 0.002              |
|                          | P68/P23            | +0.315 *****            | +0.277 *****              | +0.327 *                | - 0.027              |

**Table S3 (cont.)**

| <b><u>Chromosome</u></b> | <b><u>Loci</u></b> | <b><u>Haw Pops.</u></b> | <b><u>Apple Pops.</u></b> | <b><u>Haw Diap.</u></b> | <b><u>Haw ND</u></b> |
|--------------------------|--------------------|-------------------------|---------------------------|-------------------------|----------------------|
| Chrom. 3                 | P80/P23            | +0.237 **               | +0.138 *                  | +0.167                  | +0.059               |
|                          | P7/ <i>Had</i>     | ---                     | ---                       | +0.379 ***              | +0.285 ***           |
|                          | P16/ <i>Had</i>    | ---                     | ---                       | +0.405 ***              | +0.415 *****         |
|                          | P68/ <i>Had</i>    | ---                     | ---                       | +0.504 *****            | +0.014               |
|                          | P80/ <i>Had</i>    | ---                     | ---                       | +0.465 *****            | +0.076               |
|                          | P23/ <i>Had</i>    | ---                     | ---                       | +0.287 *                | +0.195 **            |
| Chrom. 4                 | P29/P11            | +0.146 *                | +0.051                    | - 0.081                 | - 0.064              |
|                          | P29/P25            | - 0.197 **              | +0.010                    | - 0.103                 | - 0.228 *            |
| Chrom. 5                 | P18/P9             | - 0.039                 | - 0.289 ***               | - 0.300 **              | - 0.222 *            |
|                          | P72/P55            | +0.149 *                | +0.076                    | +0.232 *                | - 0.045              |

**Table S4.** Linear regressions of microsatellite and allozyme genotypes vs. adult eclosion times for apple and hawthorn flies in the 7 day prewinter, 5 month overwinter treatment in the eclosion study. Given are the explained variation ( $r^2$ ) and slopes ( $b$  = days difference in eclosion time for substitution of a northern allele in the genotype of a locus) for the regression equations for the 20 loci displaying significant relationships with eclosion time, as determined by ANOVA (see Table S2). Dark bars indicate loci displaying significant pairwise linkage disequilibrium.

| <u>Chromosome</u> | <u>Locus</u>  | <u>r<sup>2</sup> Apple</u> | <u>b Apple</u> | <u>r<sup>2</sup> Haw</u> | <u>b Haw</u> |
|-------------------|---------------|----------------------------|----------------|--------------------------|--------------|
| Chrom. 1          | <i>Dia-2</i>  | 0.002                      | +0.53          | 0.024                    | - 2.63       |
|                   | P75           | 0.045                      | - 3.48         | 0.012                    | - 1.72       |
| Chrom. 2          | <i>Mpi</i>    | 0.129                      | - 5.29         | 0.001                    | - 0.40       |
|                   | P59           | 0.039                      | - 2.12         | 0.018                    | - 1.21       |
|                   | <i>Acon-2</i> | 0.025                      | - 2.00         | 0.081                    | - 2.83       |
|                   | <i>Me</i>     | 0.039                      | - 4.84         | 0.061                    | - 2.60       |
| Chrom. 3          | P69           | 0.077                      | - 3.17         | 0.023                    | - 1.35       |
|                   | Had           | 0.016                      | +1.80          | 0.058                    | - 3.18       |
|                   | P16           | 0.009                      | - 1.24         | 0.020                    | - 1.55       |
|                   | P68           | 0.002                      | - 0.62         | 0.086                    | - 3.02       |
| Chrom. 4          | P11           | 0.049                      | - 2.90         | 0.045                    | +2.08        |
|                   | P25           | 0.008                      | +0.90          | 0.013                    | - 0.97       |
|                   | P50           | 0.016                      | +1.56          | 0.050                    | - 2.21       |
|                   | P19           | 0.093                      | - 6.28         | 0.062                    | +2.85        |
|                   | P12           | 0.054                      | - 2.92         | 0.006                    | - 0.91       |

**Table S4 (cont.)**

| <b><u>Chromosome</u></b> | <b><u>Locus</u></b> | <b><u>r2 Apple</u></b> | <b><u>b Apple</u></b> | <b><u>r2 Haw</u></b> | <b><u>b Haw</u></b> |
|--------------------------|---------------------|------------------------|-----------------------|----------------------|---------------------|
| Chrom. 5                 | P5                  | 0.010                  | +0.99                 | 0.022                | +1.27               |
|                          | P18                 | 0.034                  | - 2.81                | 0.048                | +3.30               |
|                          | P9                  | 0.014                  | - 1.49                | 0.072                | - 3.03              |
|                          | P72                 | 0.006                  | +0.88                 | 0.036                | - 1.89              |
|                          | P27                 | 0.026                  | - 1.97                | 0.016                | - 1.29              |

**Table S5.** List of *Rhagoletis pomonella* microsatellite primer pairs (designated by “P + number”) developed by Velez *et al.* (8).

| Genbank accession No. | Primer sequences (5' to 3')                        | Expected allele size | Repeat motif                                                      | Genbank accession No. | Primer sequence (5' to 3')                     | Expected allele size | Repeat motif                         |
|-----------------------|----------------------------------------------------|----------------------|-------------------------------------------------------------------|-----------------------|------------------------------------------------|----------------------|--------------------------------------|
| P1) AY734885          | GGAAACGACATCCGGTAAAA<br>ACGGGCTCACAAACGAAATA       | 248                  | [T <sub>3</sub> (GT) <sub>n</sub> ] <sub>n</sub>                  | P20) AY734904         | TGCGTCTATTTTTCCATCACTG<br>CGCGATTGAACACAACAATC | 299                  | (GT) <sub>n</sub>                    |
| P2) AY734886          | TCCACTCAAATACGGCAACA<br>AGAGATCCCGGTGTCGTTC        | 228                  | (GT) <sub>n</sub>                                                 | P21) AY734905         | CAAGTGCCTGCTGCGTAAG<br>CCATTGCCAATTTGAATCAC    | 229                  | (GT) <sub>n</sub> T <sub>3</sub>     |
| P3) AY734887          | TCCACTCAAATACGGCAACA<br>GCAGCCGATCTTTTCGTCTA       | 188                  | (GT) <sub>n</sub>                                                 | P22) AY734906         | GGGCAATTGACACTTCCTA<br>TTCGCCTGGTAACAAAAACC    | 226                  | (GT) <sub>n</sub>                    |
| P4) AY734888          | GCAAGCGAGTCGTAATCACA<br>CCCTCATCATTGTGGTCCTC       | 185                  | (GT) <sub>n</sub> (G <sub>3</sub> T <sub>3</sub> ) <sub>n</sub>   | P23) AY734907         | AAACTGCCTTGCCTGTCATT<br>GCACTTTGTCGTTGATGCAC   | 210                  | (GT) <sub>n</sub>                    |
| P5) AY734889          | GAGCAGCAGAGGAAAAAGGA<br>TGCACTGGTGTATTCCAAGG       | 227                  | G <sub>3</sub> (GT) <sub>n</sub> G <sub>3</sub>                   | P24) AY734908         | TCAACACACGCACAACCTTT<br>TGGTTGCTTTTTGCATTTTG   | 248                  | (GT) <sub>n</sub> A(GT) <sub>n</sub> |
| P6) AY734890          | AGTCAGAGTGCGGCAAAAGT<br>CGGTAGACCTCAGGCTGATAG      | 162                  | (GT) <sub>n</sub>                                                 | P25) AY734909         | ATGACATTCGCTACGGGGTA<br>TCTCGGAGAGTGGCAGTTT    | 223                  | (GT) <sub>n</sub>                    |
| P7) AY734891          | CATTGGCAACGCTAGTTCAA<br>GCGCTGAAACCATGAAAAAT       | 236                  | (GT) <sub>n</sub>                                                 | P26) AY734910         | GCCGTCGGACTGTTATGAAT<br>TGCAATGTCAACAGCAATGA   | 249                  | (GT) <sub>n</sub>                    |
| P8) AY734892          | GCGATTTTTGAAAGCGAAAG<br>ATTCACTAGTCCGCGGTTTC       | 220                  | T <sub>3</sub> (GT) <sub>n</sub> T <sub>3</sub>                   | P27) AY734911         | TTCTCACATTTTCGCGTTTG<br>CTGGCCAATGCATAAATCCT   | 158                  | (GT) <sub>n</sub>                    |
| P9) AY734893          | CGGCAGGTAAATGACCAAAA<br>GCAATGACCGTTGGCTATTA       | 159                  | (GT) <sub>n</sub>                                                 | P28) AY734912         | ACTGGCTGATGATGATGCAA<br>TTATGTTGCATTTCGGAGCAC  | 226                  | (G3T) <sub>n</sub> (GT) <sub>n</sub> |
| P10) AY734894         | TAACAGCAGCCGTAATGCAG<br>CCATTAACCAACCGCCATAC       | 175                  | (GT) <sub>n</sub>                                                 | P29) AY734913         | TCCATGTGTGCCAGAACATT<br>GACGTTAATTTCGCTCGGTTG  | 203                  | (GT) <sub>n</sub>                    |
| P11) AY734895         | ATGCAGCCATGACTGAGATG<br>TGAAAGTAATTTACAAAAGGCTA    | 304                  | (GT) <sub>n</sub>                                                 | P30) AY734914         | CGATCGCAGCAAAGTACAGG<br>GATATGTGCACCAATGGGACT  | 151                  | (GT) <sub>n</sub>                    |
| P12) AY734896         | GGGTGTTTCATGGTAGTTGTAGAT<br>ACTAGTAAAGGAAAGGCGCAAT | 250                  | T <sub>3</sub> (GT) <sub>n</sub> G <sub>3</sub> (GT) <sub>n</sub> | P31) AY734915         | TGGGTGCCACTTCCTTTAAC<br>ATCAAAAACGCGCAAAAAC    | 162                  | (GT) <sub>n</sub>                    |
| P13) AY734897         | GACATCAACTGGTGGTACGC<br>ACCAGCCACCGATCATATTT       | 368                  | (GT) <sub>n</sub>                                                 | P32) AY734916         | CAGTGCCAAGTGAAGCGTAA<br>TGACACTGTCTGGCATTTC    | 247                  | (GT) <sub>n</sub>                    |
| P14) AY734898         | TTGCTAGCAGAAGCACTTCAA<br>CCTGTGTGCAAGGACTTCAA      | 215                  | (GT) <sub>n</sub>                                                 | P33) AY734917         | ATAATGCCAACGCAAGGAAC<br>TTTCGGAAGGTTGGAAAAACA  | 192                  | (GT) <sub>n</sub>                    |
| P15) AY734899         | CGCGAGAATTTAGTTGAGCA<br>TGCCAAGAAGTGTGTTTCC        | 286                  | (GT) <sub>n</sub>                                                 | P34) AY734918         | AGGAAACCAAAAAGCAAGCA<br>TACACGCAGAGGCTATGTGG   | 239                  | (GT) <sub>n</sub>                    |
| P16) AY734900         | CGCTTTAGATTTTCGCTACACA<br>ACGCAGTGCCAAATCTCTT      | 314                  | (GT) <sub>n</sub>                                                 | P35) AY734919         | CCGCTACAGTGCAATACACAA<br>ACGGCTAATAGTTTTCACACG | 220                  | (GT) <sub>n</sub>                    |
| P17) AY734901         | TTCGAAACCGTTTGTTACCTCT<br>CGCTATTGGAGGCAATGAAT     | 258                  | (GT) <sub>n</sub>                                                 | P36) AY734920         | TACCACTTTTCGCCGATTTT<br>AAACAGCCGGATTCAATGTC   | 246                  | (GT) <sub>n</sub>                    |
| P18) AY734902         | CCCAATGTCCCGTAAACTTC<br>TTCACCTCAATGCCAATTTCA      | 291                  | (GT) <sub>n</sub>                                                 | P37) AY734921         | CAACAGCGCGACTTAGTGAA<br>TGGCTTCCACCTTTGTTTTT   | 214                  | (GT) <sub>n</sub>                    |
| P19) AY734903         | TCTGCCTTTGCTTCTCCATT<br>TGGTGAAAAATTCAGATCACA      | 343                  | (GT) <sub>n</sub>                                                 | P38) AY734922         | TTGGACGGACAAACATGAAA<br>TTGCTAGCAGAAGCCTGTCA   | 234                  | (GT) <sub>n</sub>                    |

**Table S5 (cont.)**

| Genbank accession No. | Primer sequences (5' to 3') | Expected allele size | Repeat motif                         | Genbank accession No. | Primer sequence (5' to 3') | Expected allele size | Repeat motif                                                       |
|-----------------------|-----------------------------|----------------------|--------------------------------------|-----------------------|----------------------------|----------------------|--------------------------------------------------------------------|
| P39) AY734923         | GCGAAAATGTGGTCGTAGGT        | 217                  | (GT) <sub>n</sub>                    | P58) AY734942         | ATGTACCTATTAATGGAGTTTTTCG  | 172                  | (GT) <sub>n</sub> G <sub>3</sub> (GT) <sub>n</sub>                 |
| P40) AY734924         | ACAGTGGGCTGACACATAG         | 234                  | (GT) <sub>n</sub>                    | P59) AY734943         | TGCCGTTATACTCAGTGCATGT     | 214                  | (GT) <sub>n</sub>                                                  |
| P41) AY734925         | CGAGCAGGTGATGATAATGC        | 185                  | (GT) <sub>n</sub>                    | P60) AY734944         | CGCGTCCAACTAAGAAGTCG       | 152                  | (GT) <sub>n</sub>                                                  |
| P42) AY734926         | CCGAAAATTTGAGCCCTTA         | 168                  | (GT) <sub>n</sub>                    | P61) AY734945         | CACTCTTCCGTTGCTTGTC        | 221                  | (GT) <sub>n</sub> [G <sub>3</sub> (GT) <sub>2</sub> ] <sub>n</sub> |
| P43) AY734927         | TGCTGCTGCTGTTCTGTTCT        | 151                  | (GT) <sub>n</sub>                    | P62) AY734946         | TACAACCTAGGCAGCCCAAC       | 150                  | (GT) <sub>n</sub>                                                  |
| P44) AY734928         | TTGTGTGTTTCGCTCAAAGAAA      | 156                  | (GT) <sub>n</sub>                    | P63) AY734947         | GTCTGGTTTGGCGATCCTT        | 195                  | (GT) <sub>n</sub>                                                  |
| P45) AY734929         | ACAGCAACAGCAGCAACAAC        | 178                  | (GT) <sub>n</sub>                    | P64) AY734948         | TCFTTGGCGCTTTATTCTGTT      | 158                  | (GT) <sub>n</sub>                                                  |
| P46) AY734930         | AACAGCCATGCCAAAAGAGT        | 246                  | (GT) <sub>n</sub>                    | P65) AY734949         | CAGCGCTGCAATAAAAAGTCA      | 131                  | (GT) <sub>n</sub>                                                  |
| P47) AY734931         | TTGTGTACGGCGCTGAGTTA        | 183                  | (GT) <sub>n</sub>                    | P66) AY734950         | TGAAGAACGCCCTATCTCAAA      | 235                  | (GT) <sub>n</sub>                                                  |
| P48) AY734932         | TCTGCGCTACCCAAACTACG        | 158                  | (GT) <sub>n</sub>                    | P67) AY734951         | TGCTGATACAAAACGCCCTA       | 186                  | (GT) <sub>n</sub>                                                  |
| P49) AY734933         | AGAACGCCTCGTAAAAAGCA        | 166                  | (GT) <sub>n</sub>                    | P68) AY734952         | CAAGACGCCTACGTGTCAGA       | 164                  | (GT) <sub>n</sub>                                                  |
| P50) AY734934         | GGCTTTTGTGCTCCATTC          | 160                  | (GT) <sub>n</sub>                    | P69) AY734953         | GCCACTCAAATGCAGACATC       | 181                  | (GT) <sub>n</sub>                                                  |
| P51) AY734935         | GCGCAAACCTCCTCAAACCTCT      | 162                  | (GT) <sub>n</sub>                    | P70) AY734954         | CCTCCTTTTGACTGCCTTTT       | 200                  | (GT) <sub>n</sub>                                                  |
| P52) AY734936         | GTGTCTGGCGATAGCATTCA        | 244                  | (GT) <sub>n</sub>                    | P71) AY734955         | GCCACTAGTGACTTGACCTC       | 181                  | (GT) <sub>n</sub>                                                  |
| P53) AY734937         | GCGCATTTCTCCATTTCATTT       | 160                  | (GT) <sub>n</sub>                    | P72) AY734956         | CCFTTTGTAAAATCACGTTTTCAT   | 194                  | (GT) <sub>n</sub>                                                  |
| P54) AY734938         | GCGGTAATTGTGCGTATGTG        | 160                  | (GT) <sub>n</sub>                    | P73) AY734957         | CGGAACAAATGAAGAAAGCA       | 158                  | (GT) <sub>n</sub>                                                  |
| P55) AY734939         | TGGTCAGAGAACACTTGCTGA       | 167                  | (GT) <sub>n</sub>                    | P74) AY734958         | GCAAACCATTTTCCACGAAT       | 216                  | (GT) <sub>n</sub>                                                  |
| P56) AY734940         | TGTGCAAGGACTTCAATGGT        | 249                  | (GT) <sub>n</sub>                    | P75) AY734959         | CGAAGCACTTTTGAAGTGA        | 206                  | (GT) <sub>n</sub>                                                  |
| P57) AY734941         | TTACCCACAATCTGGCATCA        | 218                  | (GT)G <sub>3</sub> (GT) <sub>n</sub> | P76) AY734960         | CGAAGCACTTTTGAAGTGA        | 215                  | (GT) <sub>n</sub>                                                  |
|                       | AACTCCAGTGAATTATGGTTGGA     |                      |                                      |                       | TTACCACCTCGTAAAAAGCA       |                      |                                                                    |
|                       | TATTTTCGGTTCGGACTGCT        |                      |                                      |                       | GGCTTTTGTGCTCCATTC         |                      |                                                                    |
|                       | GGCATTGACTGCATTTCTCA        |                      |                                      |                       | GCGCAAACCTCCTCAAACCTCT     |                      |                                                                    |
|                       | GTGCAACCAGTGAGCAGTGT        |                      |                                      |                       | GTGTCTGGCGATAGCATTCA       |                      |                                                                    |
|                       | TCTGACTGGCCCGTATTTGT        |                      |                                      |                       | GCGCATTTCTCCATTTCATTT      |                      |                                                                    |
|                       | TGCTGGGTGTCAACAACCTTT       |                      |                                      |                       | GCGGTAATTGTGCGTATGTG       |                      |                                                                    |
|                       | TGAAACAATAAAAAGCACTACGTGA   |                      |                                      |                       | TGGTCAGAGAACACTTGCTGA      |                      |                                                                    |
|                       | ATAGTTGGACGCGCTTGACT        |                      |                                      |                       | TGTGCAAGGACTTCAATGGT       |                      |                                                                    |
|                       | AAGAAAATGTTGGGACGTTG        |                      |                                      |                       | TTACCCACAATCTGGCATCA       |                      |                                                                    |
|                       | ATTTGTGCGCTAGTGTGCTG        |                      |                                      |                       | AACTCCAGTGAATTATGGTTGGA    |                      |                                                                    |
|                       | GCGGTGCAAAATAAACACAA        |                      |                                      |                       | TATTTTCGGTTCGGACTGCT       |                      |                                                                    |
|                       | TGTGCTAAATTACCCAAAAGCA      |                      |                                      |                       | GGCATTGACTGCATTTCTCA       |                      |                                                                    |
|                       | GCGTCAATTCAGTCAACCAAA       |                      |                                      |                       | GTGCAACCAGTGAGCAGTGT       |                      |                                                                    |
|                       | GGCTATTGAAATCACGGCTA        |                      |                                      |                       | TCTGACTGGCCCGTATTTGT       |                      |                                                                    |
|                       | AGCGAAAATGGCGTAAACAA        |                      |                                      |                       | TGCTGGGTGTCAACAACCTTT      |                      |                                                                    |
|                       | AGGTTCAATGCCAATGTCGT        |                      |                                      |                       | TGAAACAATAAAAAGCACTACGTGA  |                      |                                                                    |
|                       | GCATGCAGGGCGTATCTAAA        |                      |                                      |                       | ATAGTTGGACGCGCTTGACT       |                      |                                                                    |
|                       | TTTTTCAAATTCGGTTTCC         |                      |                                      |                       | AAGAAAATGTTGGGACGTTG       |                      |                                                                    |
|                       | TTGTCGATGATTTATTGCAAATG     |                      |                                      |                       | ATTTGTGCGCTAGTGTGCTG       |                      |                                                                    |
|                       |                             |                      |                                      |                       | GCGGTGCAAAATAAACACAA       |                      |                                                                    |
|                       |                             |                      |                                      |                       | TGTGCTAAATTACCCAAAAGCA     |                      |                                                                    |
|                       |                             |                      |                                      |                       | GCGTCAATTCAGTCAACCAAA      |                      |                                                                    |
|                       |                             |                      |                                      |                       | GGCTATTGAAATCACGGCTA       |                      |                                                                    |
|                       |                             |                      |                                      |                       | AGCGAAAATGGCGTAAACAA       |                      |                                                                    |
|                       |                             |                      |                                      |                       | AGGTTCAATGCCAATGTCGT       |                      |                                                                    |
|                       |                             |                      |                                      |                       | GCATGCAGGGCGTATCTAAA       |                      |                                                                    |
|                       |                             |                      |                                      |                       | TTTTTCAAATTCGGTTTCC        |                      |                                                                    |
|                       |                             |                      |                                      |                       | TTGTCGATGATTTATTGCAAATG    |                      |                                                                    |

**Table S5 (cont.)**

| Genbank accession No. | Primer sequences (5' to 3')                  | Expected allele size | Repeat motif      | Genbank accession No. | Primer sequence (5' to 3')                       | Expected allele size | Repeat motif      |
|-----------------------|----------------------------------------------|----------------------|-------------------|-----------------------|--------------------------------------------------|----------------------|-------------------|
| P77) AY734961         | GGCTTTTGTATCATCCAGCA<br>CAACAGCAGCACATCCACTC | 198                  | (GT) <sub>n</sub> | P80) AY734964         | GGACAGTTGTGGTTGCTGAA<br>TCCTTTGCAATGTTATGGTAATTG | 205                  | (GT) <sub>n</sub> |
| P78) AY734962         | CGCTTGTGTGCAATTCTGT<br>TGCCAGTTGCTCAGAGAAGA  | 236                  | (GT) <sub>n</sub> | P81) AY734965         | GAAGAACAGGGGGCTAATCC<br>TTTTTGCTTCCTCGGGTTTT     | 226                  | (GT) <sub>n</sub> |
| P79) AY734963         | TTTTGGATCACCATAATGTGC<br>GATGCCAAACAATCTGCTG | 198                  | (GT) <sub>n</sub> |                       |                                                  |                      |                   |



## Supporting Information Figure Legends

**Fig. S1.** *Rhagoletis pomonella* collecting sites genotyped in the study. Also shown are the ranges of the apple and hawthorn fly races in the eastern United States. A = apple, H = hawthorn population. See Table S1 for site descriptions.

**Fig. S2.** Linkage relationships of microsatellites on chromosomes 1-5 depicted as networks of evolutionary map distances (in centiMorgans) between loci based on data from seven test crosses. Widths of bolded lines demarcate relative degree to which microsatellites show linkage disequilibrium in natural populations and the selection experiment. Asterisks in panel B) indicate that P59, P26, P46, and P73 also display linkage disequilibrium, but not in all pairwise combinations. The locations of allozymes are not shown because they were not mapped in the crosses. However, the allozymes *Dia-2* and *Aat-2* (chrom. 1); *Me*, *Acon-2*, and *Mpi* (chrom. 2); and *Had* (chrom. 3) were all in linkage disequilibrium with certain of the microsatellites on the same chromosome displaying disequilibrium (see Table S3 for all significant pairwise composite disequilibrium values among microsatellites and allozymes). Numbered microsatellites in parentheses below networks give sets of loci showing no recombination in a test cross, implying an inversion polymorphism in the female parent.

**Fig. S3.** Results of outlier analyses using Bayescan (4), where separate analyses were run for each of the four sympatric apple and hawthorn population pairs ('comparison'). Three loci (P16, *Me* and *Acon-2*) were detected as statistical outliers (Bayes Factor > 1 being indicative of strong support for a model with selection on a particular locus over a model without selection on that locus). Similar results were obtained using a different analytical method, namely the 'fdist' method of Beaumont and Nichols (2), as implemented in LOSITAN (3).

**Fig. S4.** Microsatellite allele frequencies for apple (open circles) and hawthorn (filled triangles) fly populations plotted against latitude for chromosome 1. Also given are  $r^2$  values (explained variation) for linear regressions between allele frequencies for a locus among hawthorn and apple sites and latitude, as well as whether the locus displayed significant host-related differentiation as determined by the Monte-Carlo bootstrapping ANOVA analysis (designated by ANOVA Host or Host/Latitude Interaction), a F-test for heterogeneity in slopes between the linear regressions for the host races (designated by Slope), and Fisher exact tests for allele frequencies between hawthorn and apple populations at individual sympatric sites (designated by asterisks above hawthorn population triangle symbols). Alleles provide the total number of variants segregating for a locus and the size (in base pairs) of the different alleles for the pooled allele class plotted in the figure. \* =  $P \leq 0.05$ , \*\* =  $P \leq 0.01$ , \*\*\* =  $P \leq 0.001$ , \*\*\*\* =  $P \leq 0.0001$ , \*\*\*\*\* =  $P \leq 0.00001$ , \*\*\*\* =  $P \leq 0.00001$ , \*\*\*\*\* =  $P \leq 0.000001$ .

**Fig. S5.** Microsatellite allele frequencies for apple (open circles) and hawthorn (filled triangles) fly populations plotted against latitude for chromosome 2. Also given are  $r^2$  values (explained variation) for linear regressions between allele frequencies for a locus among hawthorn and apple sites and latitude, as well as whether the locus displayed significant host-related differentiation as determined by the Monte-Carlo bootstrapping ANOVA analysis (designated by ANOVA Host or Host/Latitude Interaction), a F-test for heterogeneity in slopes between the linear regressions for the host races (designated by Slope), and Fisher exact tests for allele frequencies between hawthorn and apple populations at individual sympatric sites (designated by asterisks above hawthorn population triangle symbols). Alleles provide the total number of variants segregating for a locus and the size (in base pairs) of the different alleles for the pooled allele class plotted in the figure. \* =  $P \leq 0.05$ , \*\* =  $P \leq 0.01$ , \*\*\* =  $P \leq 0.001$ , \*\*\*\* =  $P \leq 0.0001$ , \*\*\*\*\* =  $P \leq 0.00001$ , \*\*\*\* =  $P \leq 0.00001$ , \*\*\*\*\* =  $P \leq 0.000001$ .

**Fig. S6.** Microsatellite allele frequencies for apple (open circles) and hawthorn (filled triangles) fly populations plotted against latitude for chromosome 3. Also given are  $r^2$  values (explained

variation) for linear regressions between allele frequencies for a locus among hawthorn and apple sites and latitude, as well as whether the locus displayed significant host-related differentiation as determined by the Monte-Carlo bootstrapping ANOVA analysis (designated by ANOVA Host or Host/Latitude Interaction), F-test for heterogeneity in slopes between the linear regressions for the host races (designated by Slope), and Fisher exact tests for allele frequencies between hawthorn and apple populations at individual sympatric sites (designated by asterisks above hawthorn population triangle symbols). Alleles provide the total number of variants segregating for a locus and the size (in base pairs) of the different alleles for the pooled allele class plotted in the figure. \* =  $P \leq 0.05$ , \*\* =  $P \leq 0.01$ , \*\*\* =  $P \leq 0.001$ , \*\*\*\* =  $P \leq 0.0001$ , \*\*\*\*\* =  $P \leq 0.00001$ , \*\*\*\*\* =  $P \leq 0.000001$ .

**Fig. S7.** Microsatellite allele frequencies for apple (open circles) and hawthorn (filled triangles) fly populations plotted against latitude for chromosome 4. Also given are  $r^2$  values (explained variation) for linear regressions between allele frequencies for a locus among hawthorn and apple sites and latitude, as well as whether the locus displayed significant host-related differentiation as determined by the Monte-Carlo bootstrapping ANOVA analysis (designated by ANOVA Host or Host/Latitude Interaction), F-test for heterogeneity in slopes between the linear regressions for the host races (designated by Slope), and Fisher exact tests for allele frequencies between hawthorn and apple populations at individual sympatric sites (designated by asterisks above hawthorn population triangle symbols). Alleles provide the total number of variants segregating for a locus and the size (in base pairs) of the different alleles for the pooled allele class plotted in the figure. \* =  $P \leq 0.05$ , \*\* =  $P \leq 0.01$ , \*\*\* =  $P \leq 0.001$ , \*\*\*\* =  $P \leq 0.0001$ , \*\*\*\*\* =  $P \leq 0.00001$ , \*\*\*\*\* =  $P \leq 0.000001$ .

**Fig. S8.** Microsatellite allele frequencies for apple (open circles) and hawthorn (filled triangles) fly populations plotted against latitude for chromosome 5. Also given are  $r^2$  values (explained variation) for linear regressions between allele frequencies for a locus among hawthorn and apple sites and latitude, as well as whether the locus displayed significant host-related differentiation as determined by the Monte-Carlo bootstrapping ANOVA analysis (designated by ANOVA Host or Host/Latitude Interaction), F-test for heterogeneity in slopes between the linear regressions for the host races (designated by Slope), and Fisher exact tests for allele frequencies between hawthorn and apple populations at individual sympatric sites (designated by asterisks above hawthorn population triangle symbols). Alleles provide the total number of variants segregating for a locus and the size (in base pairs) of the different alleles for the pooled allele class plotted in the figure. \* =  $P \leq 0.05$ , \*\* =  $P \leq 0.01$ , \*\*\* =  $P \leq 0.001$ , \*\*\*\* =  $P \leq 0.0001$ , \*\*\*\*\* =  $P \leq 0.00001$ , \*\*\*\*\* =  $P \leq 0.000001$ .

**Fig. S9.** Genetic responses for loci on chromosomes 1-5 in the selection experiment. Shown are allele frequency differences between flies eclosing in the 7 day diapause minus 35 day non-diapause treatment. Sign of the response indicates if flies in the diapause treatment had higher frequencies of alleles more common to the apple race at the Grant, MI site (+) or hawthorn race (-). Of the 26 loci displaying significant allele frequency responses in the selection experiment, 21 shifted in a direction favoring apple race alleles at the Grant, MI site in surviving diapausing flies. Bars indicate sets of loci showing significant linkage disequilibrium among themselves in the study, as determined by the composite method of Weir (7). \* =  $P \leq 0.05$ , \*\* =  $P \leq 0.01$ , \*\*\* =  $P \leq 0.001$  for significance level of allele frequency difference between diapause vs. non-diapause rearing treatments, as determined by Fisher exact tests.

**Fig. S10.** Spearman rank correlation ( $r$ ) between mean  $F_{ST}$  values for sympatric hawthorn and apple fly populations for microsatellite and allozyme markers (a metric for the degree of genetic differentiation in nature) vs. the magnitude of the genetic response of loci in the selection experiment, as measured by marginal fitness value estimates for the favored allele class at a locus (i.e., the allele class having higher frequency in the 7 day diapause treatment).

Fig. S1

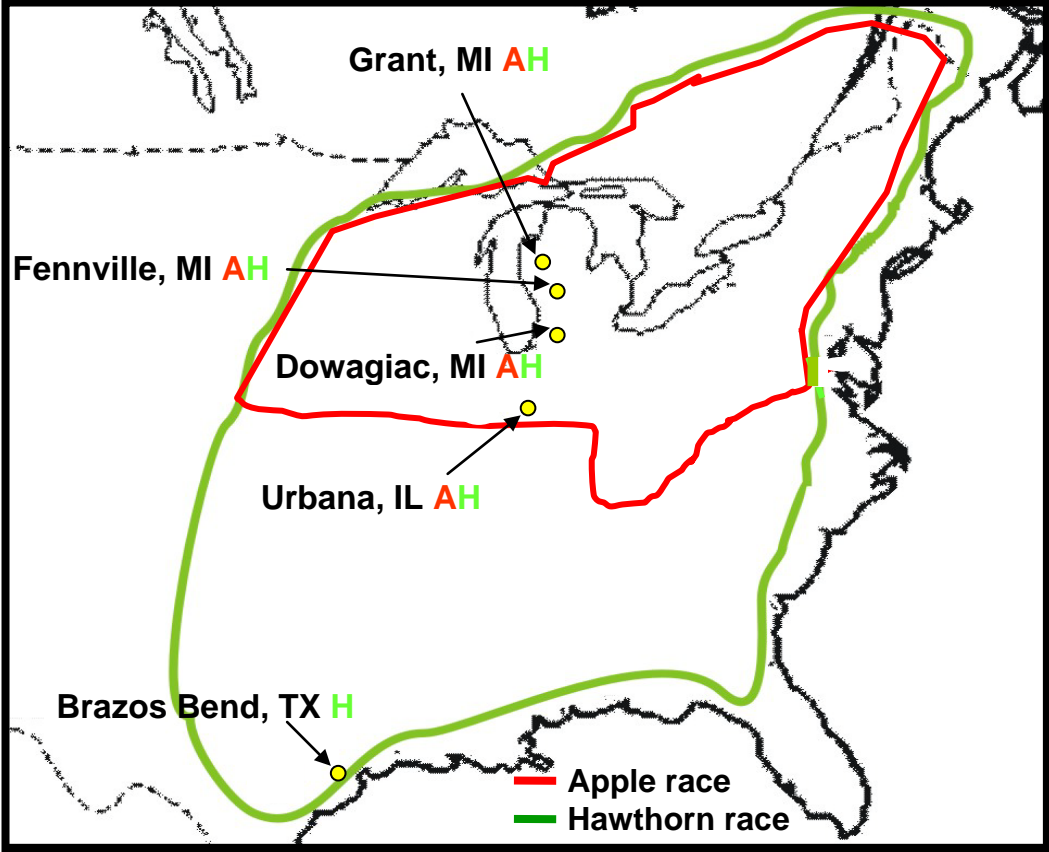

**Fig. S2**

**A) Chromosome 1 (7 crosses)**

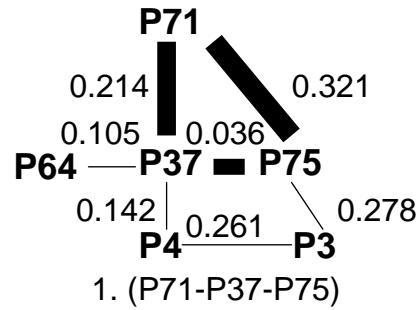

**B) Chromosome 2 (7 crosses)**

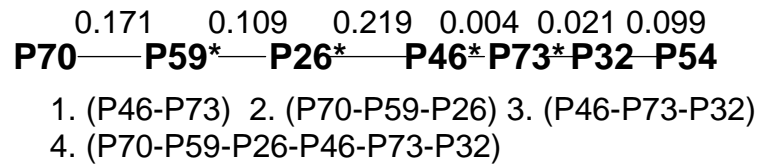

**C) Chromosome 3 (7 crosses)**

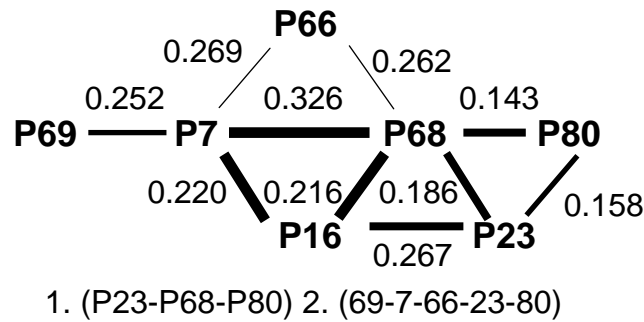

**E) Chromosome 4 (7 crosses)**

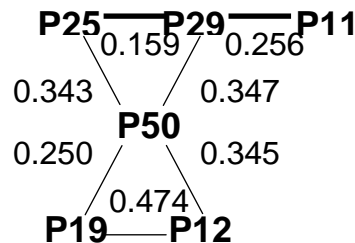

**F) Chromosome 5 (7 crosses)**

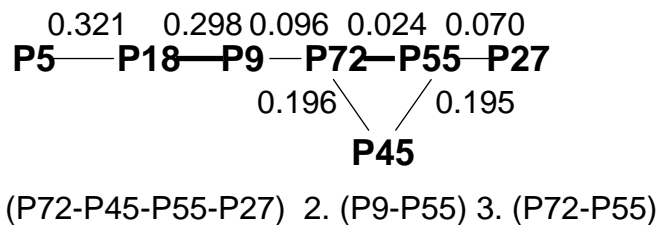

Fig. S3

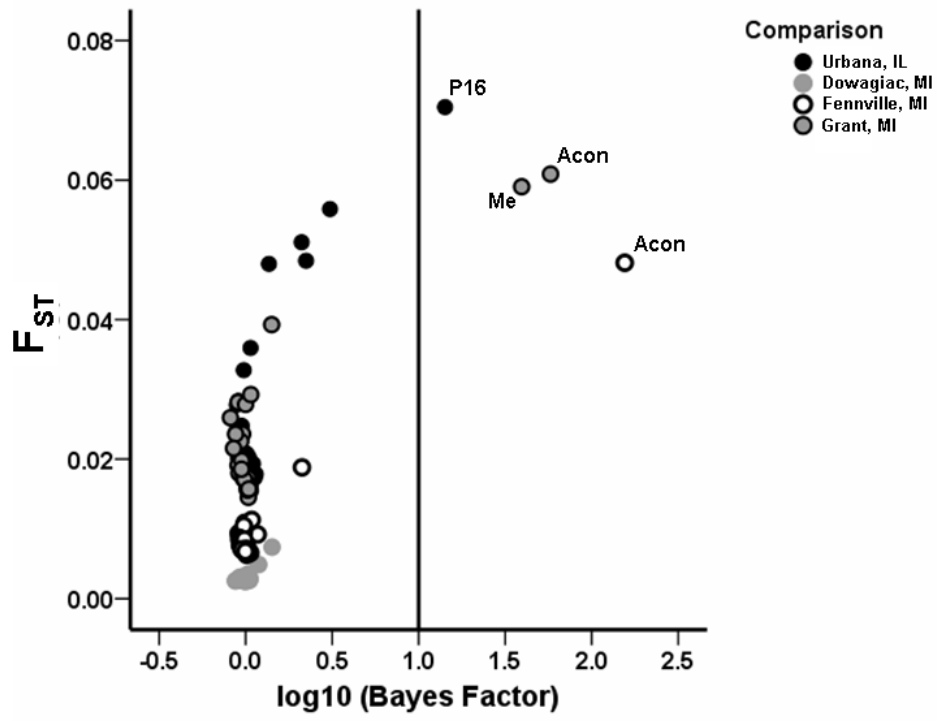

Fig. S4

# Chromosome 1

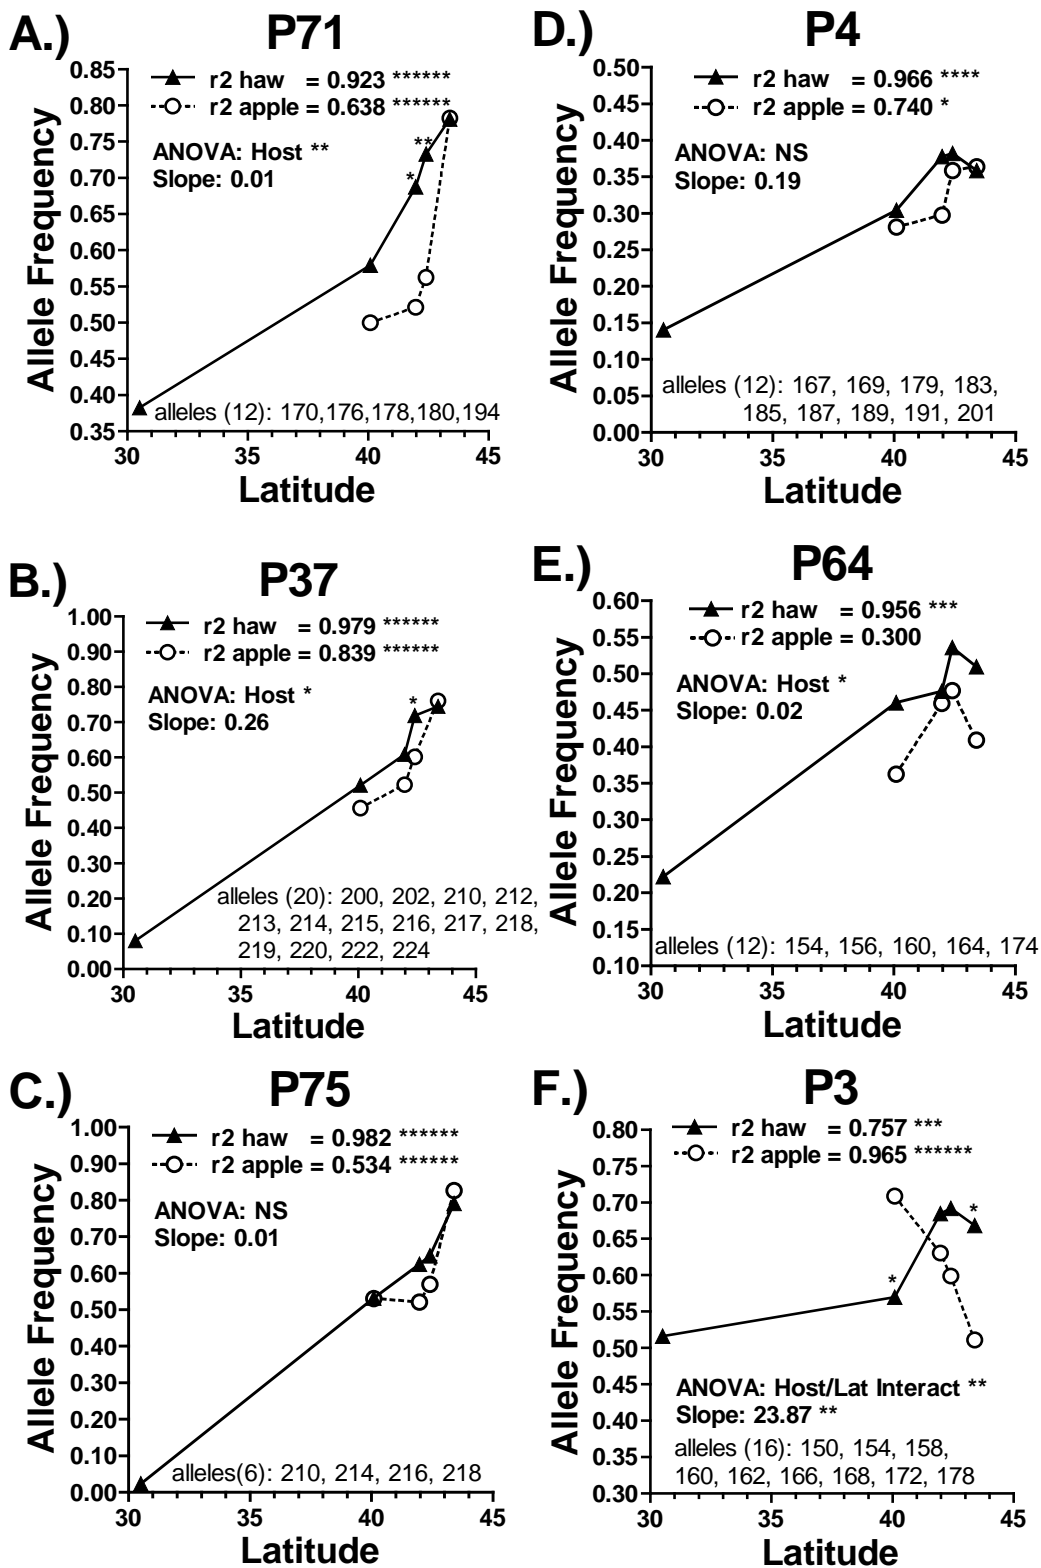

Fig. S5

# Chromosome 2

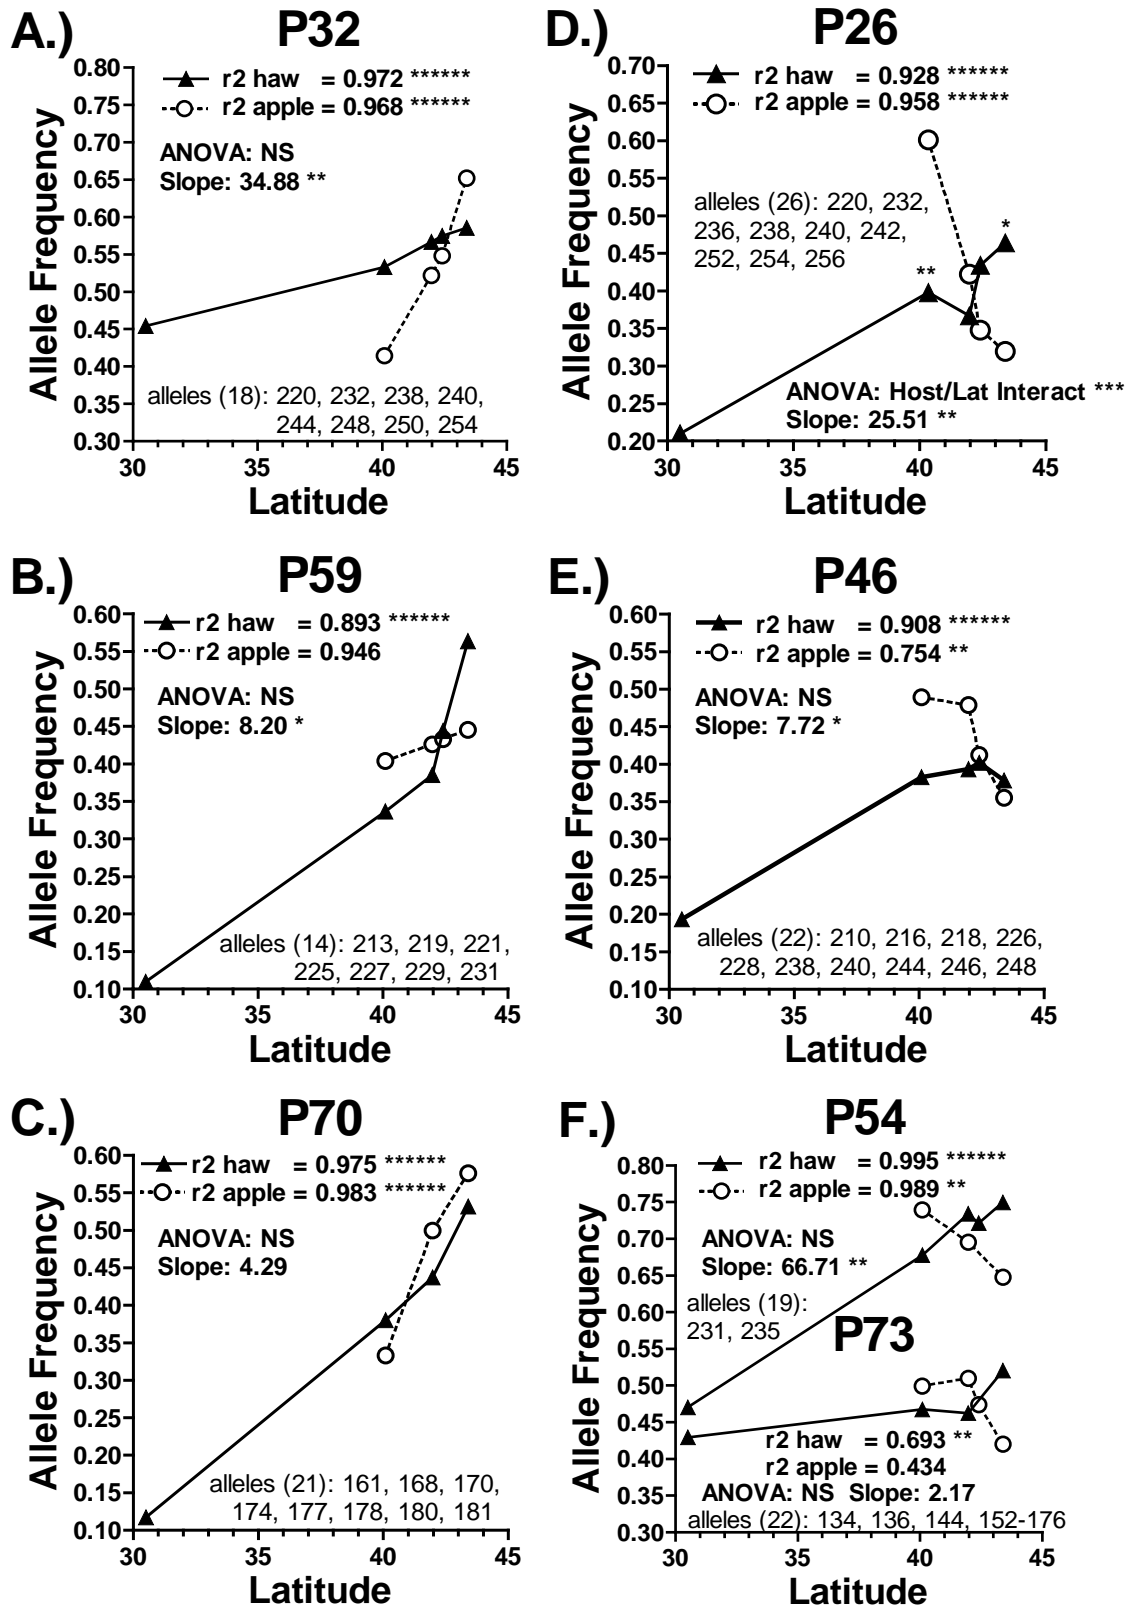

Fig. S6 **Chromosome 3**

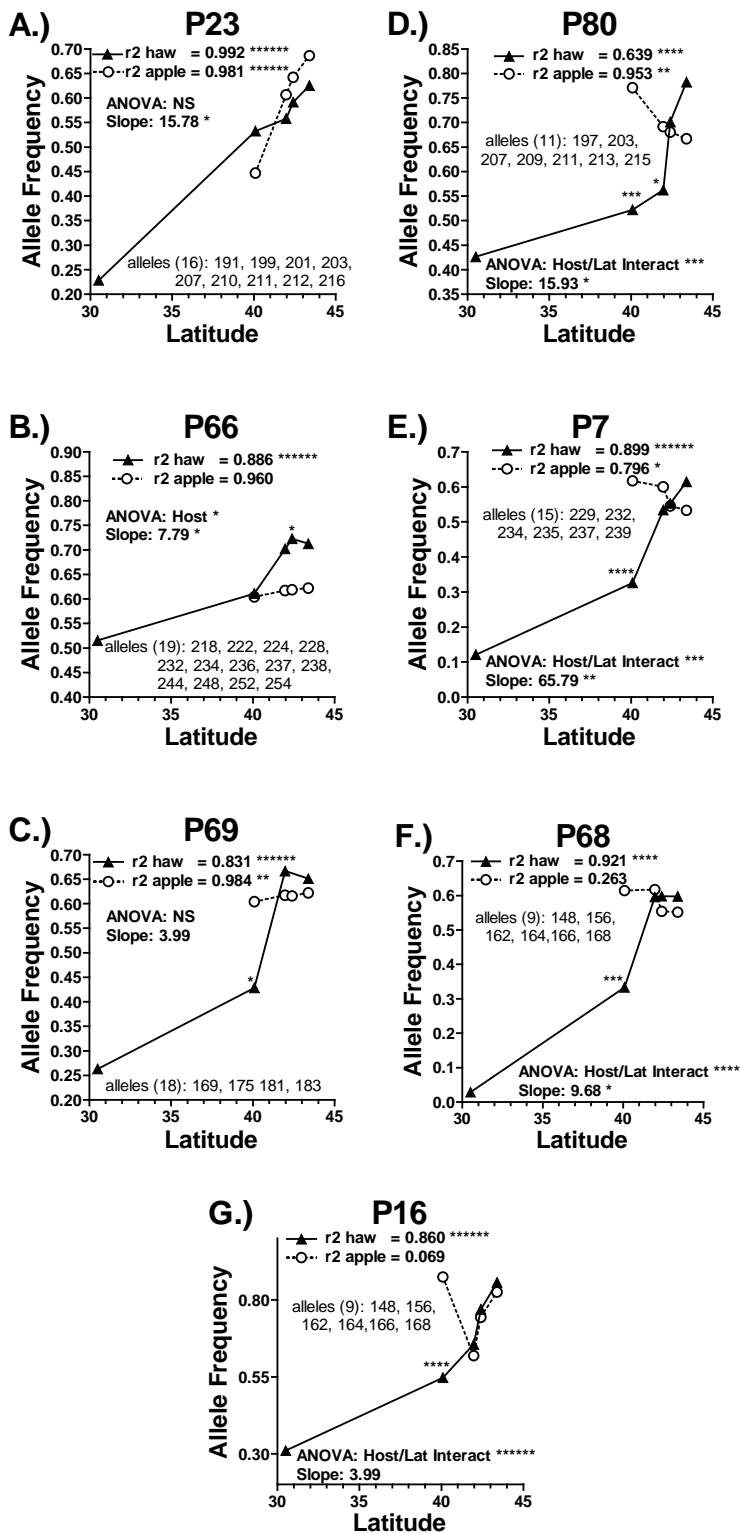



Fig. S7

# Chromosome 4

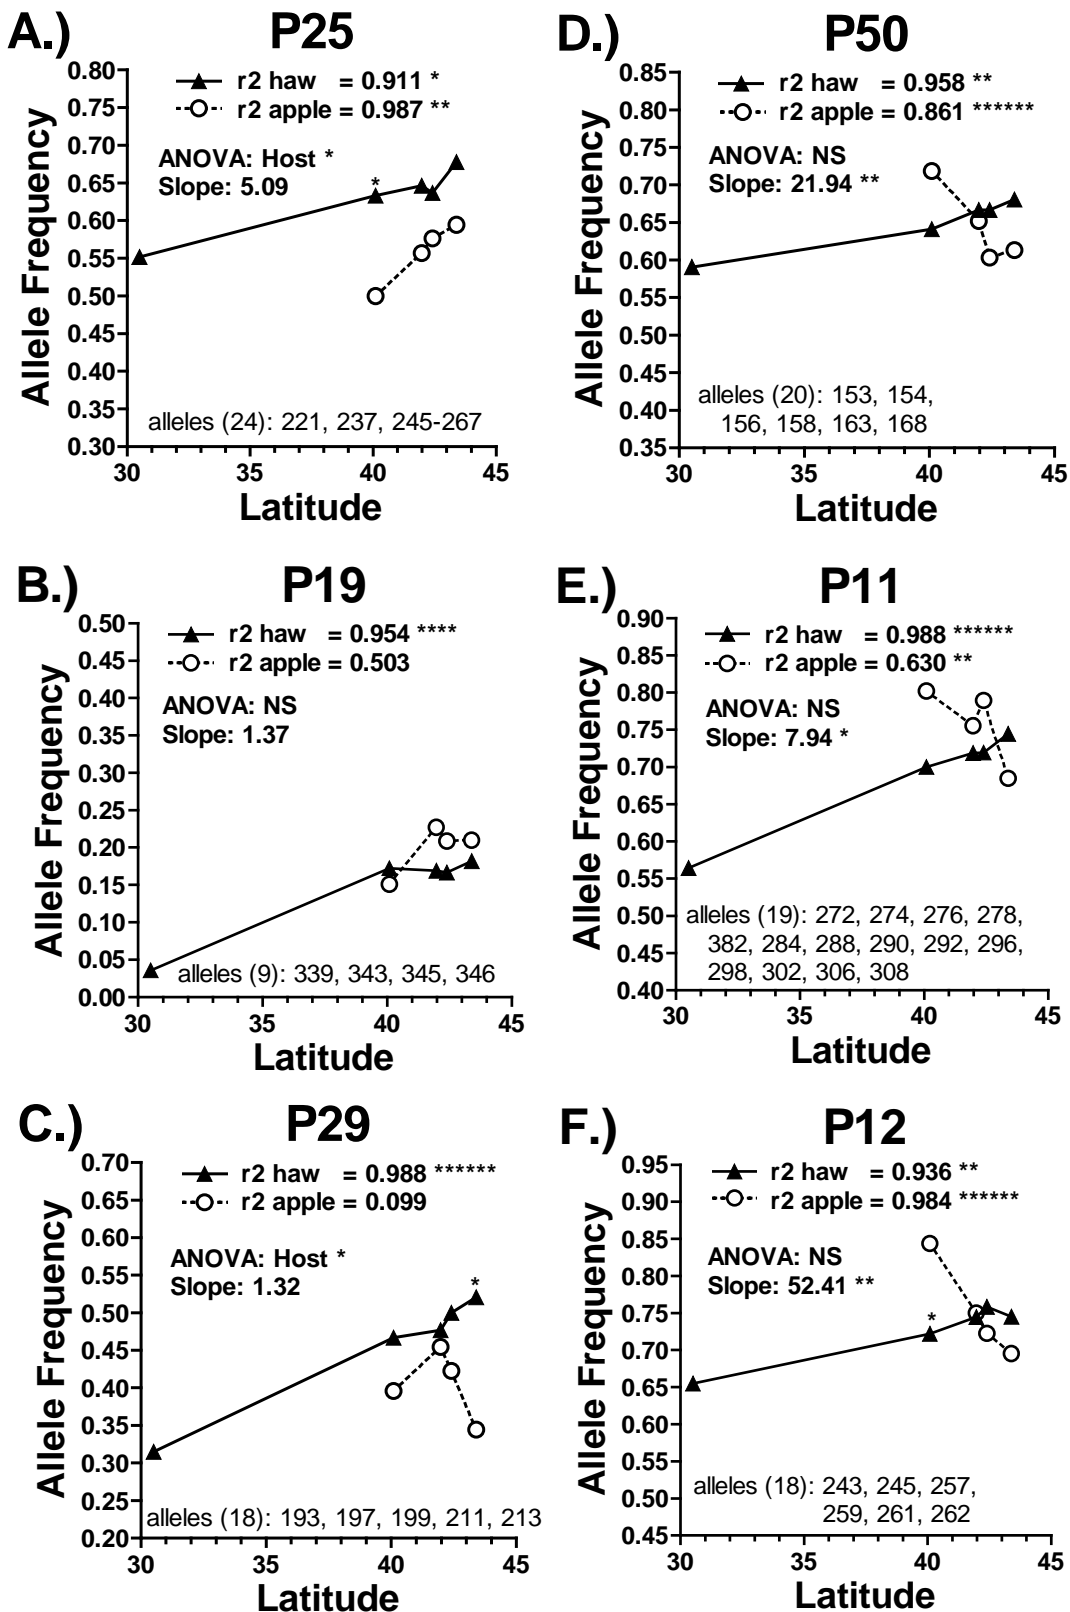

Fig. S8

# Chromosome 5

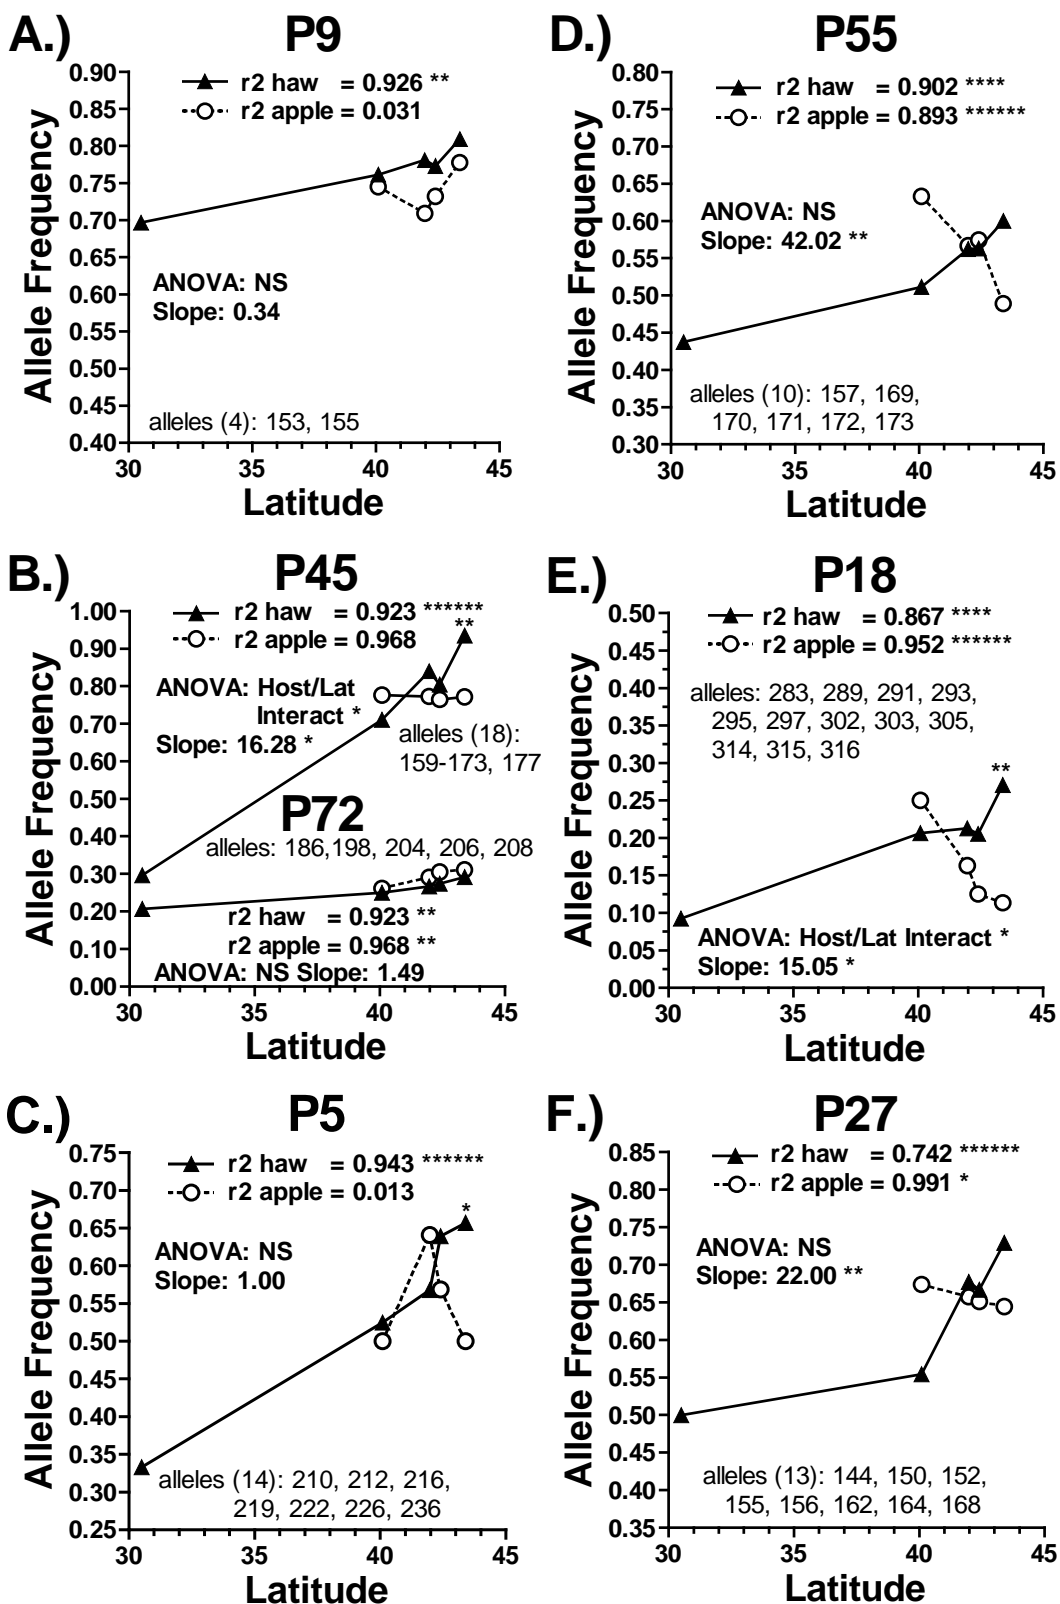

Fig. S9

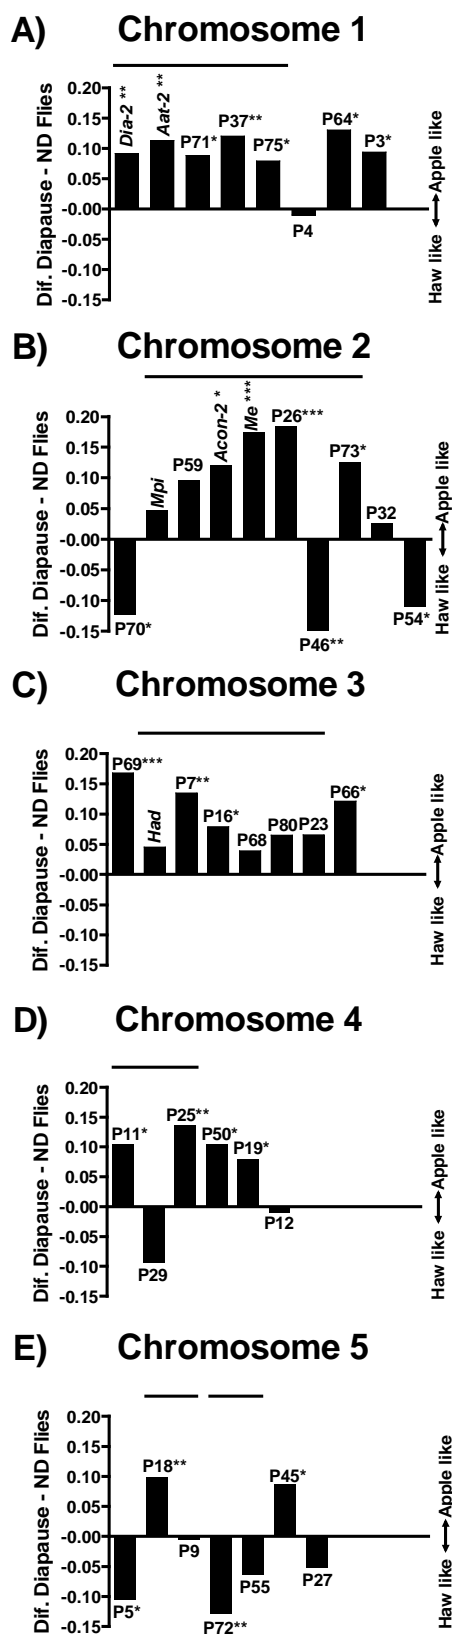

Fig. S10

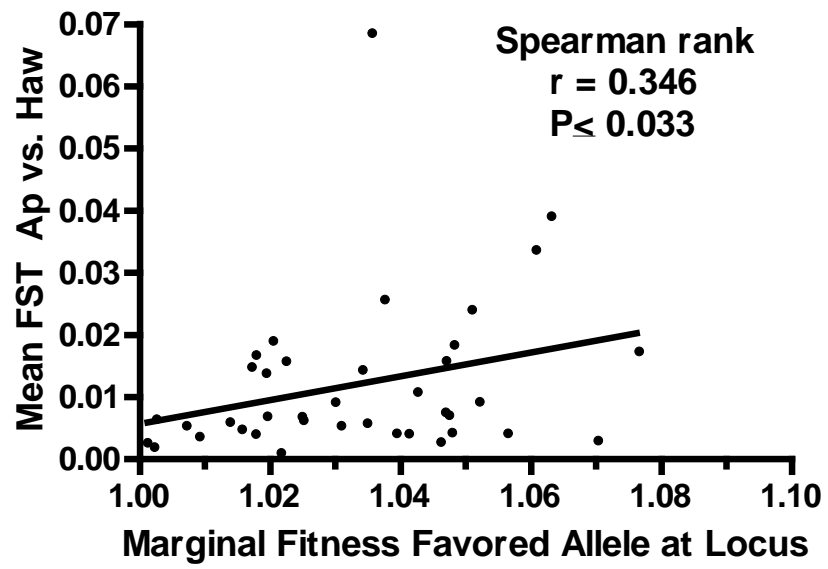

Supplement: 1000939107_sapp.pdf [file 1000939107_sapp.pdf]
